# Supplementary material for: Metal–organic frameworks in a blended polythiophene hybrid film with surface-mediated vertical phase separation for the fabrication of a humidity sensor
Source: Royal Society of Chemistry journal article supplement (doi:10.1039/c8ra09201j), 2019-01-01
Supplement: c8ra09201j1.pdf [file c8ra09201j1.pdf]

**Supporting Information for**

**Metal Organic Frameworks in a Blended Polythiophene  
Hybrid Film with Surface-Mediated Vertical Phase  
Separation for the Fabrication of a Humidity Sensor**

Young Jin Jang, Yoo Eil Jung, Gun Woo Kim, Chang Yeon Lee\*, Yeong Don Park\*

Department of Energy and Chemical Engineering, Incheon National University, Incheon  
22012, Korea

E-mail: cylee@inu.ac.kr; ydpark@inu.ac.kr

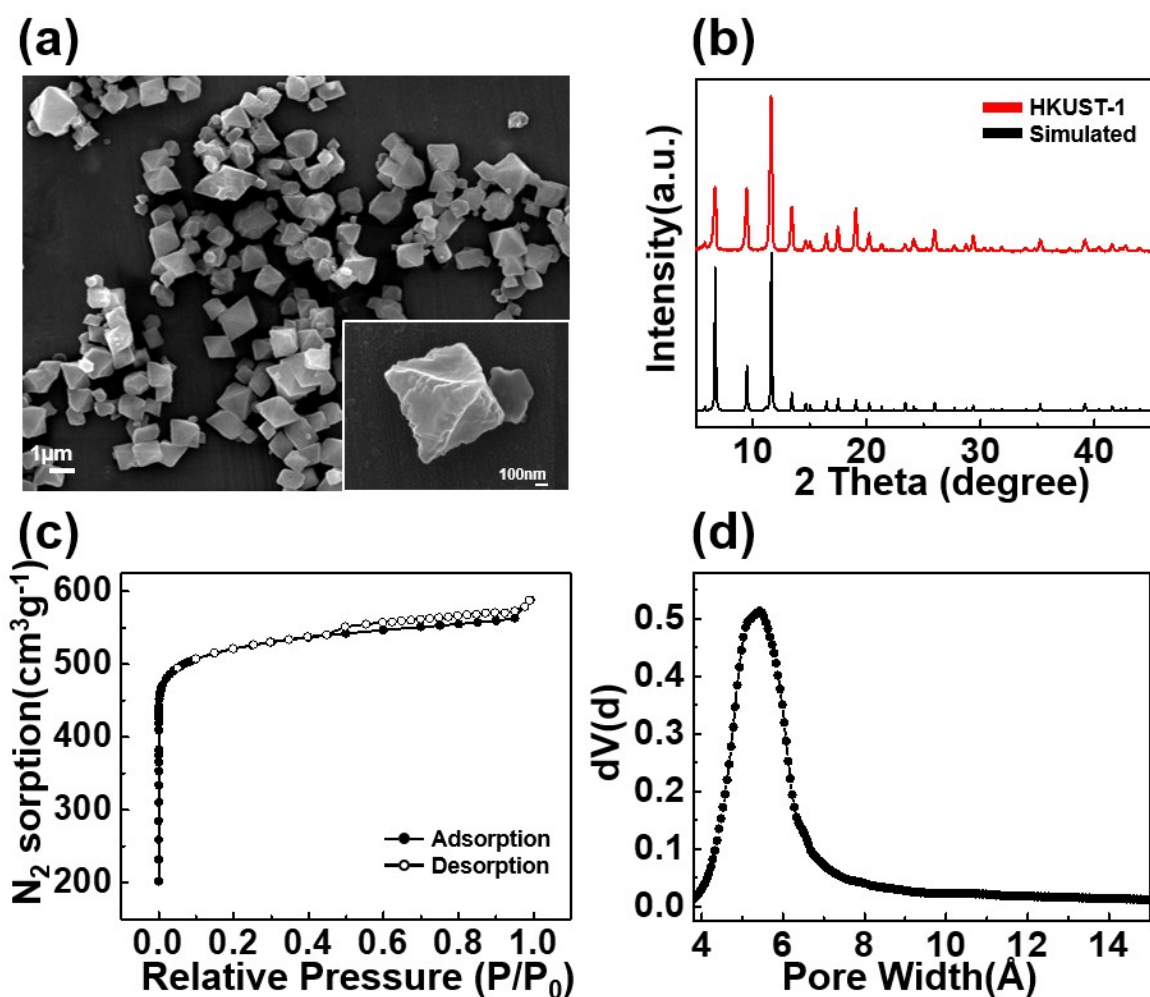

**Figure S1.** (a) Morphologies of the synthesized HKUST-1, characterized by a low and high (inset) magnification FE-SEM. (b) X-ray diffraction patterns of the simulated (black) and synthesized (red) HKUST-1, (c) N<sub>2</sub> adsorption isotherm at 298 K (surface area 2065 m<sup>2</sup>/g) and (d) DFT pore size distributions of HKUST-1 obtained from the N<sub>2</sub> isotherm at 77 K.

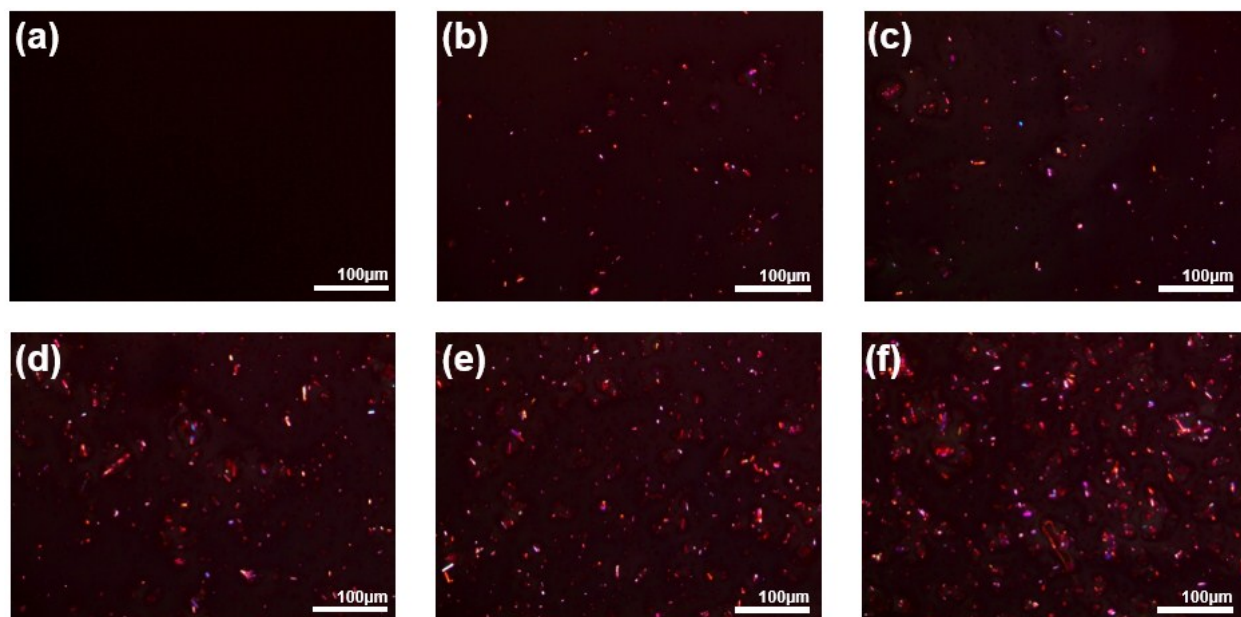

**Figure S2.** Polarized light microscope images of HKUST-1/P3HT films having various HKUST-1 contents, spin-coated onto cover glasses: (a) 0 mg, (b) 1 mg, (c) 2 mg, (d) 3 mg, (e) 5 mg, and (f) 10 mg HKUST-1, in a polymer solution (10 mg/mL).

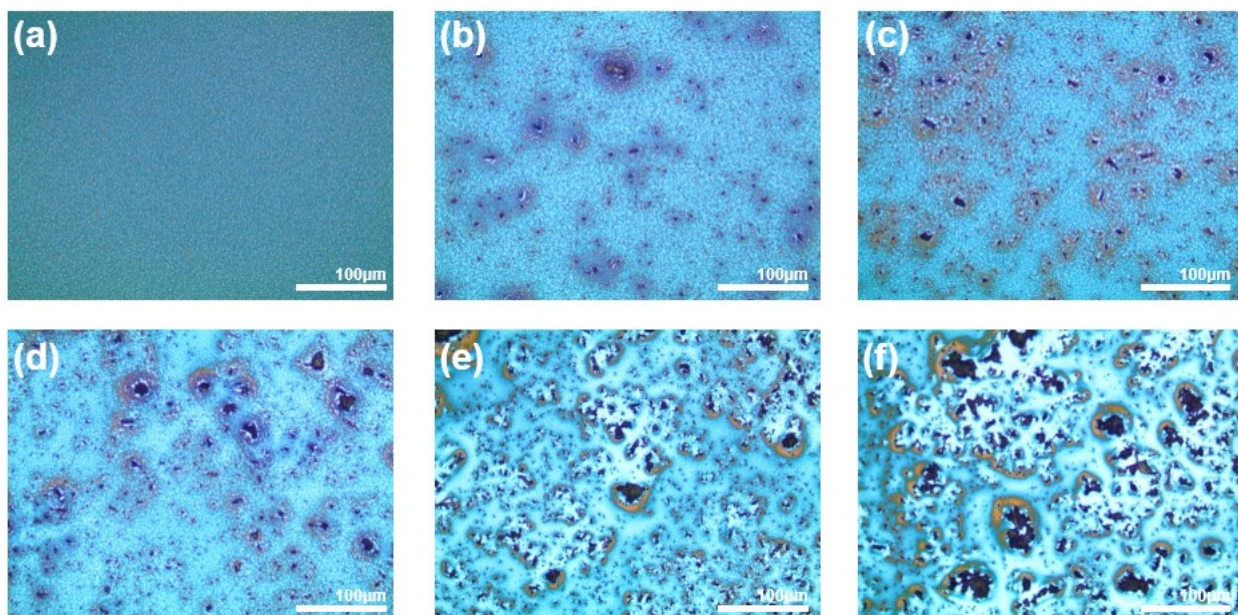

**Figure S3.** Optical microscope images of HKUST-1/P3HT films prepared with various HKUST-1 concentrations spin-coated onto a  $\text{SiO}_2/\text{Si}$  substrate: (a) 0 mg, (b) 1 mg, (c) 2 mg, (d) 3 mg, (e) 5 mg, and (f) 10 mg HKUST-1, in a polymer solution (10 mg/mL).

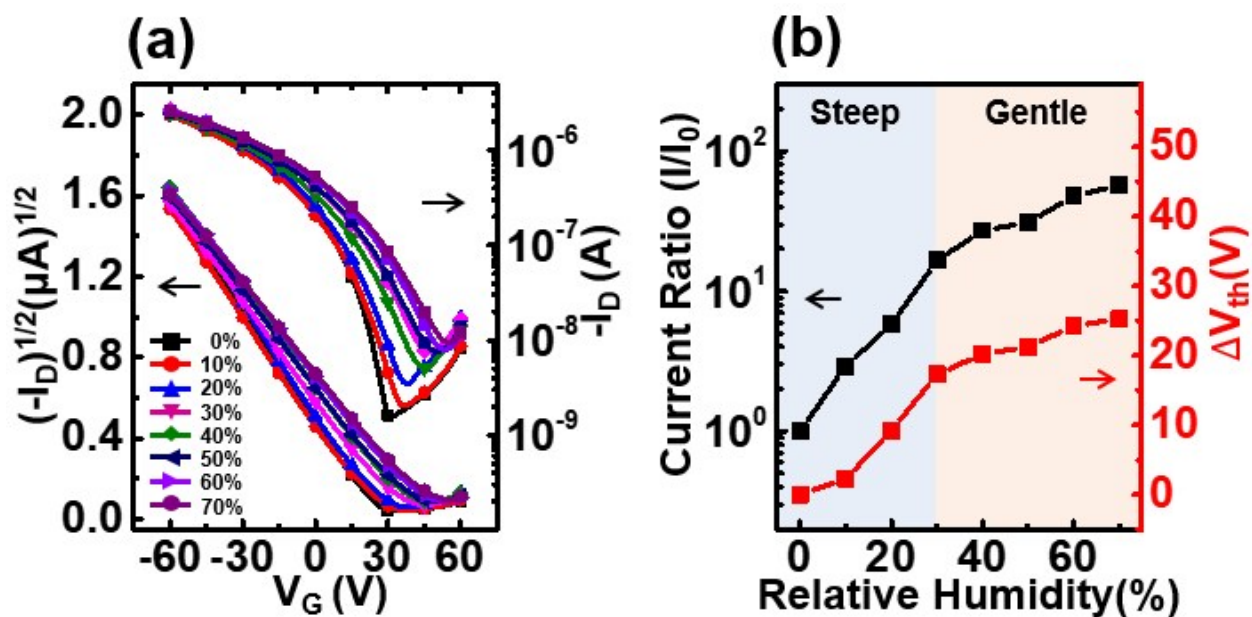

**Figure S4.** (a) Transfer characteristics ( $I_D$ - $V_G$ ) of a HKUST-1/P3HT hybrid film coated onto HMDS at a fixed drain voltage ( $V_D = -60$  V) and at various relative humidity, from 0 % to 70 %. HKUST-1/P3HT films were prepared with 2 mg/mL HKUST-1 added 10 mg/mL P3HT solution. (b) Summary of the current ratios and the threshold voltages at  $V_G = 25$  V as a function of the relative humidity.

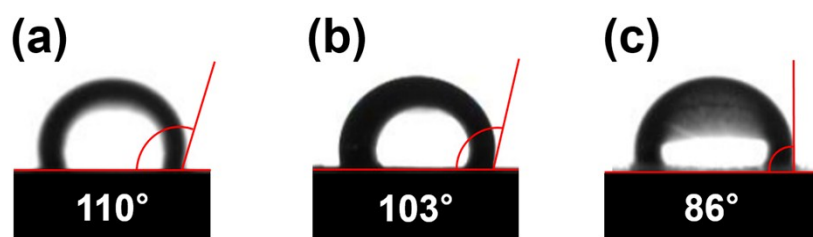

**Figure S5.** Water contact angles of the HKUST-1/P3HT coated films on an HMDS-treated SiO<sub>2</sub>/Si substrate, as a function of the HKUST-1 content: (a) 0 mg/mL, (b) 5 mg/mL, and (c) 10 mg/mL HKUST-1.

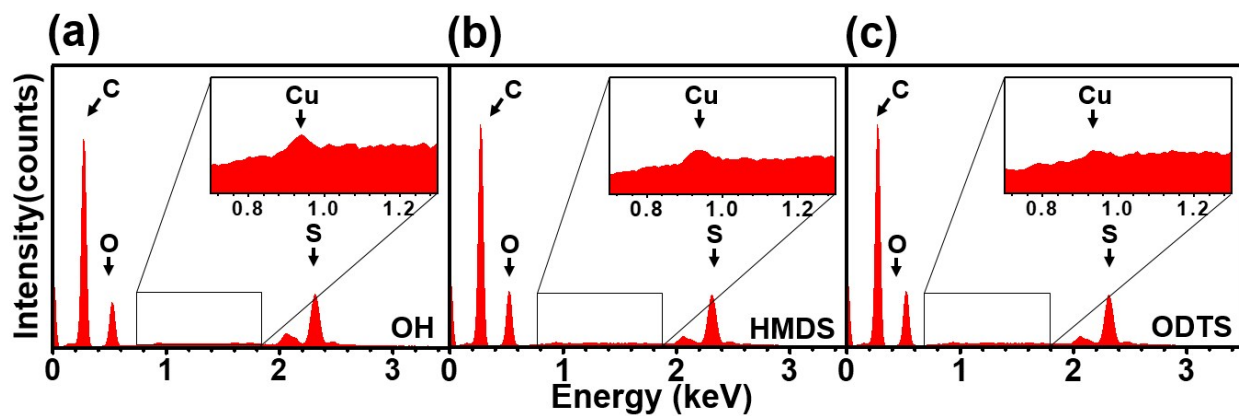

**Figure S6.** Point EDS data obtained from a flipped HKUST-1/P3HT film detached from (a) OH (b) HMDS (c) or ODTS substrates.

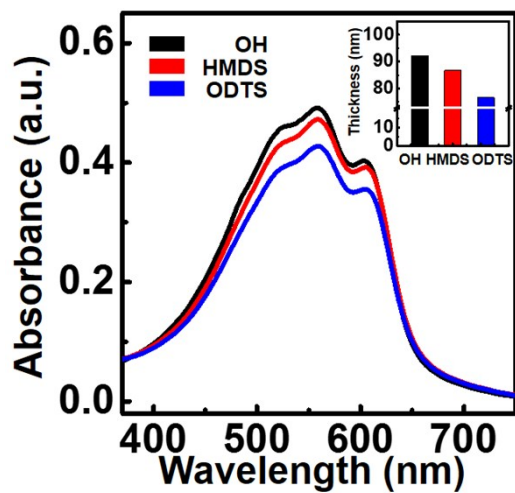

**Figure S7.** UV-Vis spectra of the HKUST-1/P3HT film coated onto the three substrates: OH, HMDS and ODTS. The inset shows the thickness values of each film which was determined by ellipsometer.
